# Supplementary material
Source: PubMed Central journal article supplement (PMC8936672)
Supplement: bmjstel-2020-000625supp001.pdf [file bmjstel-2020-000625supp001.pdf]

### Feedback questionnaire

1. Which type of simulation are you giving feedback on?

*OMS Virtual Reality*

*SimMan 3G®*

2. Was this your first or second scenario?

*First*

*Second*

3. I feel more **confident** in performing an ABCDE assessment on an unwell patient.

*1 (Strongly disagree)*

*2 (Disagree)*

*3 (Undecided)*

*4 (Agree)*

*5 (Strongly agree)*

4. I **enjoyed** the learning experience provided by the simulation technology.

*1 (Strongly disagree)*

*2 (Disagree)*

*3 (Undecided)*

*4 (Agree)*

*5 (Strongly agree)*

5. The simulation technology used provided a **useful** learning experience.

*1 (Strongly disagree)*

*2 (Disagree)*

*3 (Undecided)*

*4 (Agree)*

*5 (Strongly agree)*

6. The simulation technology used provided a **realistic** experience

*1 (Strongly disagree)*

*2 (Disagree)*

*3 (Undecided)*

*4 (Agree)*

*5 (Strongly agree)*

7. I felt fully **immersed** in the clinical scenario rather than being aware of my peers observing.

- 1 (*Strongly disagree*)
- 2 (*Disagree*)
- 3 (*Undecided*)
- 4 (*Agree*)
- 5 (*Strongly agree*)

8. I felt there was a significant degree of **prompting** during the scenario.

- 1 (*Strongly disagree*)
- 2 (*Disagree*)
- 3 (*Undecided*)
- 4 (*Agree*)
- 5 (*Strongly agree*)

9. I felt the scenario allowed me to develop and demonstrate my **team working** skills.

- 1 (*Strongly disagree*)
- 2 (*Disagree*)
- 3 (*Undecided*)
- 4 (*Agree*)
- 5 (*Strongly agree*)

10. I felt the scenario allowed me to develop and demonstrate my **clinical reasoning** skills.

- 1 (*Strongly disagree*)
- 2 (*Disagree*)
- 3 (*Undecided*)
- 4 (*Agree*)
- 5 (*Strongly agree*)

11. I found the simulation technology **easy to use**.

- 1 (*Strongly disagree*)
- 2 (*Disagree*)
- 3 (*Undecided*)
- 4 (*Agree*)

5 (Strongly agree)

12. What did you feel were the **positive** aspects of this simulation technology?

13. What did you feel were the **negative** aspects or limitations of this simulation technology?

14. Any suggestions for future improvement

**Answer only if this was the second simulation scenario:**

15. Overall, which simulation technology do you feel has been the **most useful** in helping you to prepare for real clinical practice?

*OMS Virtual Reality*

*SimMan 3G®*
